# Supplementary material for: Critical Transition in Tissue Homeostasis Accompanies Murine Lung Senescence
Source: PubMed Central journal article supplement (PMC3119663; doi:10.1371/journal.pone.0020712), 2011-06-21
Supplement: pone.0020712.s006.pdf [file pone.0020712.s006.pdf]

Supplemental Table 1: Top 200 Genes in Airspace Peak

| Probe Search_key                                 | Rank | Probe_Id     | Entrez_ID | Gene Symbol                               | Gene Name                                                                          |
|--------------------------------------------------|------|--------------|-----------|-------------------------------------------|------------------------------------------------------------------------------------|
| IGKV6-17_Y15978_Ig_kappa_variable_6-17_13        | 1    | ILMN_2674666 | 676136    | LOC676136                                 | similar to Ig kappa chain V-V region MPC11 precursor (LOC676136), mRNA.            |
| IGHV1S13_X00160\$K00706_Ig_heavy_variable_1S13_8 | 2    | ILMN_1259003 | 637785    | LOC637785                                 | similar to Ig heavy chain V region 3 precursor (LOC637785), mRNA.                  |
| IGKV12-41_AJ235953_Ig_kappa_variable_12-41_12    | 3    | ILMN_1230194 | 619960    | Igkv12-41                                 | immunoglobulin kappa chain variable 12-41                                          |
| IGKV12-44_AJ235955_Ig_kappa_variable_12-44_18    | 4    | ILMN_1226667 | 619960    | Igkv12-41                                 | immunoglobulin kappa chain variable 12-41                                          |
| IGKV12-46_AJ235956_Ig_kappa_variable_12-46_18    | 5    | ILMN_1258548 | 692245    | Igkv12-46                                 | immunoglobulin kappa chain variable 12-46                                          |
| IGKV4-54_AJ231223_Ig_kappa_variable_4-54_15      | 6    | ILMN_2608768 | 385291    | Igkv4-54                                  | immunoglobulin kappa chain variable 4-54                                           |
| scl28918.2.12_106                                | 7    | ILMN_1254159 | 16120     | Igk-V38                                   | immunoglobulin kappa chain variable 38(V38)                                        |
| IGHV1S63_L26853_Ig_heavy_variable_1S63_4         | 8    | ILMN_1225733 | 677643    | LOC677643                                 | similar to monoclonal antibody BBK-2 heavy chain (LOC677643), misc RNA.            |
| IGHV1S36_M13788_Ig_heavy_variable_1S36_40        | 9    | ILMN_2437019 | ---       | IGHV1S36_M13788_Ig_heavy_variable_1S36_40 | ---                                                                                |
| IGHV1S120_AF025443_Ig_heavy_variable_1S120_8     | 10   | ILMN_2470564 | 16049     | IGHV1S120                                 | immunoglobulin alpha heavy chain variable region                                   |
| scl0380794.2_30                                  | 11   | ILMN_1249975 | 380794    | Ighg                                      | Immunoglobulin heavy chain (gamma polypeptide), transcript variant 1 (Ighg), mRNA. |
| IGHV14S1_X03571\$M12813_Ig_heavy_variable_14S1_9 | 12   | ILMN_2597469 | 544904    | LOC544904                                 | similar to idiotypic anti-NP IgG(1) heavy chain V-D-J (LOC544904), mRNA.           |
| IGKV16-104_AJ235936_Ig_kappa_variable_16-104_171 | 13   | ILMN_2515256 | 100046546 | LOC100046546                              | similar to IgM (kappa)light-chain                                                  |
| IGKV6-14_Y15975_Ig_kappa_variable_6-14_11        | 14   | ILMN_2699222 | 669053    | LOC669053                                 | similar to Ig kappa chain V-V region MPC11 precursor (LOC669053), mRNA.            |
| IGKV6-25_AJ235962_Ig_kappa_variable_6-25_13      | 15   | ILMN_2465985 | 676136    | LOC676136                                 | similar to Ig kappa chain V-V region MPC11 precursor (LOC676136), mRNA.            |

|                                                   |    |                  |               |                     |                                                                          |
|---------------------------------------------------|----|------------------|---------------|---------------------|--------------------------------------------------------------------------|
| scl012228.1_44                                    | 16 | ILMN_26850<br>11 | 12228         | Btg3                | B-cell translocation gene 3                                              |
| IGHV1S124_AF02544<br>9_ig_heavy_variable_1S124_11 | 17 | ILMN_24229<br>74 | 16061         | IGHV1S124           | immunoglobulin heavy variable region                                     |
| IGKV8-31_AJ235957_ig_kappa_variable_8-31_3        | 18 | ILMN_12303<br>32 | 546905        | Igkv8-31            | similar to anti-DNA immunoglobulin light chain variable IgM              |
| IGKV10-95_AF029261_ig_kappa_variable_10-95_20     | 19 | ILMN_27662<br>96 | 434031        | predicted gene 5573 | predicted gene, EG434031, Igkv10-95                                      |
| scl27608.15.10_44                                 | 20 | ILMN_12454<br>72 | 11576         | Afp                 | alpha fetoprotein                                                        |
| IGKV4-68_AJ231222_ig_kappa_variable_4-68_18       | 21 | ILMN_24907<br>58 | 384515        | Gm1419              | gene model 1419, (NCBI) IGKV4-68                                         |
| GI_6678306                                        | 22 | ILMN_28308<br>21 | 21784         | Tff1                | trefoil factor 1                                                         |
| IGKV4-77_AJ235940_ig_kappa_variable_4-77_18       | 23 | ILMN_12586<br>80 | 672339        | LOC672339           | similar to Ig kappa chain V-IV region S107B precursor (LOC672339), mRNA. |
| IGKV19-93_AJ235935_ig_kappa_variable_19-93_104    | 24 | ILMN_12389<br>32 | 16120         | Igk-V38             | immunoglobulin kappa chain variable 38(V38)                              |
| scl40238.3.1_75                                   | 25 | ILMN_26492<br>75 | 259301        | Leap2               | liver-expressed antimicrobial peptide 2                                  |
| scl0258722.1_9                                    | 26 | ILMN_12530<br>92 | 258722        | Olf1r611            | olfactory receptor 611                                                   |
| IGKV4-61_AJ231209_ig_kappa_variable_4-61_12       | 27 | ILMN_24697<br>43 | 236047        | Igkv4-74            | immunoglobulin kappa chain variable 4-74                                 |
| IGKV4-52_AJ239198_ig_kappa_variable_4-52_18       | 28 | ILMN_24310<br>17 | 723991        | Igkv4-52            | immunoglobulin kappa chain variable 4-52                                 |
| IGKV6-15_Y15976_ig_kappa_variable_6-15_15         | 29 | ILMN_12225<br>00 | 100047<br>162 | LOC100047162        | similar to immunoglobulin kappa-chain (LOC100047162), mRNA.              |
| IGKV1-88_AJ231206_ig_kappa_variable_1-88_289      | 30 | ILMN_24958<br>96 | 692154        | Igkv1-88            | immunoglobulin kappa chain variable 1-88                                 |
| scl16414.9.494_144                                | 31 | ILMN_12363<br>15 | 70750         | Kdsr                | 3-ketodihydrospingosine reductase                                        |
| IGKV4-73_AJ231216_ig_kappa_variable_4-73_18       | 32 | ILMN_12422<br>58 | 628516        | Gm6889              | predicted gene, EG628516, Igkv4-73                                       |

|                                               |    |              |        |                |                                                                    |
|-----------------------------------------------|----|--------------|--------|----------------|--------------------------------------------------------------------|
| scl47286.9_3                                  | 33 | ILMN_1243014 | 68036  | Zfp706         | zinc finger protein 706                                            |
| scl00025.1_14                                 | 34 | ILMN_2738739 | 57752  | Tacc2          | transforming, acidic coiled-coil containing protein 2              |
| scl54436.7_325                                | 35 | ILMN_2692306 | 20937  | Suv39h1        | suppressor of variegation 3-9 homolog 1 (Drosophila)               |
| IGKV8-30_AJ235948_ig_kappa_variable_8-30_91   | 36 | ILMN_2631763 | 384419 | Igkv8-30       | immunoglobulin light chain variable region                         |
| IGKV12-67_AJ235933_ig_kappa_variable_12-67_27 | 37 | ILMN_2426436 | 628551 | Igkv12-67      | immunoglobulin kappa chain variable 12-67                          |
| scl0381816.1_161                              | 38 | ILMN_2593944 | 381816 | 4922502D21 Rik | RIKEN cDNA 4922502D21 gene                                         |
| scl22872.7_240-S                              | 39 | ILMN_2723788 | 66471  | Anp32e         | acidic (leucine-rich) nuclear phosphoprotein 32 family, member E   |
| scl49283.17_415                               | 40 | ILMN_1216742 | 22061  | Trp63          | transformation related protein 63                                  |
| scl30502.9.1_2                                | 41 | ILMN_2673121 | 24058  | Sigirr         | single immunoglobulin and toll-interleukin 1 receptor (TIR) domain |
| scl54976.5.1_9                                | 42 | ILMN_1215810 | 68995  | Mcts1          | malignant T cell amplified sequence 1                              |
| scl54594.3.1_69                               | 43 | ILMN_2463395 | 22037  | Trap1a         | tumor rejection antigen P1A                                        |
| scl52590.16_341                               | 44 | ILMN_2738893 | 226090 | Ermp1          | endoplasmic reticulum metalloproteinase 1                          |
| scl16356.5_24                                 | 45 | ILMN_1239134 | 72585  | Lypd1          | Ly6/Plaur domain containing 1                                      |
| IGKV4-57_AJ231221_ig_kappa_variable_4-57_15-S | 46 | ILMN_2463573 | 236047 | Igkv4-74       | immunoglobulin kappa chain variable 4-74                           |
| scl011799.4_8                                 | 47 | ILMN_2632712 | 11799  | Birc5          | baculoviral IAP repeat-containing 5                                |
| scl0017433.2_285                              | 48 | ILMN_1223628 | 17433  | Mobp           | myelin-associated oligodendrocytic basic protein                   |
| scl057778.24_5                                | 49 | ILMN_2603689 | 57778  | Fmn1           | formin-like 1                                                      |

|                                             |    |              |           |                   |                                                                    |
|---------------------------------------------|----|--------------|-----------|-------------------|--------------------------------------------------------------------|
| scl39207.10.1_15                            | 50 | ILMN_1219679 | 66179     | 1110031I02<br>Rik | RIKEN cDNA 1110031I02 gene                                         |
| scl11520.1.1_262                            | 51 | ILMN_2495367 | 171258    | V1ri7             | vomeronasal 1 receptor, I7                                         |
| scl9411.1.1_287                             | 52 | ILMN_2690884 | 258749    | Olf556            | olfactory receptor 556                                             |
| scl0117160.17_30                            | 53 | ILMN_2522155 | 117160    | Ttyh2             | tweety homolog 2 (Drosophila)                                      |
| scl0258886.1_30                             | 54 | ILMN_2603395 | 258886    | Olf1299           | olfactory receptor 1299                                            |
| scl52739.10.1_4                             | 55 | ILMN_2422676 | 22786     | Zp1               | zona pellucida glycoprotein 1                                      |
| scl00100929.2_2                             | 56 | ILMN_1229311 | 100929    | Tyw1              | tRNA-yW synthesizing protein 1 homolog (S. cerevisiae)             |
| scl067248.2_33                              | 57 | ILMN_2711551 | 67248     | Rpl39             | ribosomal protein L39                                              |
| IGKV4-55_AJ231225_ig_kappa_variable_4-55_21 | 58 | ILMN_1247185 | 100047316 | LOC100047316      | similar to anti-MOG Z12 variable light chain (LOC100047316), mRNA. |
| IGKV4-62_AJ231210_ig_kappa_variable_4-62_17 | 59 | ILMN_1220577 | 636752    | LOC636752         | similar to Ig kappa chain V-VI region NQ2-6.1 (LOC636752), mRNA.   |
| GI_31982096-S                               | 60 | ILMN_3160326 | 19092     | Prkg2             | protein kinase, cGMP-dependent, type II                            |
| scl49065.9.1_50                             | 61 | ILMN_2651781 | 67841     | Atg3              | autophagy-related 3 (yeast)                                        |
| scl23055.15.1_74                            | 62 | ILMN_1244226 | 53317     | Plrg1             | pleiotropic regulator 1, PRL1 homolog (Arabidopsis)                |
| scl0056357.2_122                            | 63 | ILMN_2728379 | 56357     | Ivd               | isovaleryl coenzyme A dehydrogenase                                |
| scl38509.3.1_171                            | 64 | ILMN_1257581 | 16545     | Kera              | keratocan                                                          |
| scl000615.1_57                              | 65 | ILMN_2659503 | 12554     | Cdh13             | cadherin 13                                                        |
| scl41112.7.1_150                            | 66 | ILMN_1214957 | 73634     | 1700125H20<br>Rik | RIKEN cDNA 1700125H20 gene                                         |
| scl18868.1.64_1                             | 67 | ILMN_68032   | 68032     | Tmem85            | transmembrane protein 85                                           |

|                                                           |    |                      |        |                   |                                                                         |
|-----------------------------------------------------------|----|----------------------|--------|-------------------|-------------------------------------------------------------------------|
|                                                           |    | 26571<br>63          |        |                   |                                                                         |
| scl050916.6_54                                            | 68 | ILMN_<br>27398<br>70 | 50916  | Irx4              | Iroquois related homeobox 4 (Drosophila)                                |
| IGHV14S2_X03572\$L2<br>9396_Ig_heavy_varia<br>ble_14S2_16 | 69 | ILMN_<br>27699<br>04 | 630322 | LOC630322         | similar to Ig heavy chain V region B1-8/186-2 precursor                 |
| scl067702.1_56                                            | 70 | ILMN_<br>26925<br>63 | 67702  | Rnf149            | ring finger protein 149                                                 |
| scl0020646.1_10                                           | 71 | ILMN_<br>26319<br>79 | 84704  | Snurf             | SNRPN upstream reading frame                                            |
| IGKV4-<br>79_AJ231214_Ig_kap<br>pa_variable_4-79_9        | 72 | ILMN_<br>27457<br>75 | 213684 | Gm194             | gene model 194, (NCBI) IGKV4-79                                         |
| scl51014.5.1_34                                           | 73 | ILMN_<br>27643<br>25 | 56716  | Gbl               | G protein beta subunit-like                                             |
| scl23236.14.1_102                                         | 74 | ILMN_<br>27017<br>79 | 214048 | Larp2             | La ribonucleoprotein domain family, member 2                            |
| scl35959.8.1_6                                            | 75 | ILMN_<br>27695<br>25 | 15288  | Hmbs              | hydroxymethylbilane synthase                                            |
| scl28232.31_105                                           | 76 | ILMN_<br>26601<br>47 | 74741  | 5730419I09<br>Rik | RIKEN cDNA 5730419I09 gene                                              |
| scl0022774.2_273                                          | 77 | ILMN_<br>12131<br>45 | 22774  | Zic4              | zinc finger protein of the cerebellum 4                                 |
| scl0074570.2_105                                          | 78 | ILMN_<br>27442<br>59 | 74570  | Zkscan1           | zinc finger with KRAB and SCAN domains 1                                |
| scl0013134.2_302                                          | 79 | ILMN_<br>27203<br>39 | 13134  | Dach1             | dachshund 1 (Drosophila)                                                |
| scl33543.7.1_97                                           | 80 | ILMN_<br>27106<br>39 | 330820 | 4933402J07<br>Rik | RIKEN cDNA 4933402J07 gene                                              |
| scl18443.13.1_19                                          | 81 | ILMN_<br>26488<br>67 | 18041  | Nfs1              | nitrogen fixation gene 1 (S. cerevisiae)                                |
| IGKV6-<br>23_AJ235961_Ig_kap<br>pa_variable_6-23_15       | 82 | ILMN_<br>27228<br>93 | 637227 | LOC637227         | similar to Ig kappa chain V-V region MPC11 precursor (LOC637227), mRNA. |
| scl45352.5_13                                             | 83 | ILMN_<br>12307<br>21 | 67065  | Polr3d            | polymerase (RNA) III (DNA directed)<br>polypeptide D                    |
| scl24618.9_190                                            | 84 | ILMN_<br>12425       | 320541 | A530082C11<br>Rik | RIKEN cDNA A530082C11 gene                                              |

|                                                  |     |              |        |            |                                                                                |
|--------------------------------------------------|-----|--------------|--------|------------|--------------------------------------------------------------------------------|
|                                                  |     | 42           |        |            |                                                                                |
| scl018194.8_27                                   | 85  | ILMN_2609273 | 18194  | Nsdhl      | NAD(P) dependent steroid dehydrogenase-like                                    |
| scl00108058.2_28                                 | 86  | ILMN_1222123 | 108058 | Camk2d     | calcium/calmodulin-dependent protein kinase II, delta                          |
| scl0012848.2_316                                 | 87  | ILMN_2740523 | 12848  | Cops2      | COP9 (constitutive photomorphogenic) homolog, subunit 2 (Arabidopsis thaliana) |
| scl37747.5_571                                   | 88  | ILMN_2709001 | 216152 | BC005764   | cDNA sequence BC005764 (BC005764), mRNA                                        |
| scl0320162.19_2                                  | 89  | ILMN_1246221 | 320162 | Ccdc45     | coiled-coil domain containing 45                                               |
| IGKV14-100_AJ231243_Ig_kappa_variable_14-100_12  | 90  | ILMN_1232444 | 243439 | Igkv14-100 | immunoglobulin kappa chain variable 14-100                                     |
| IGKV15-103_AJ231269_Ig_kappa_variable_15-103_262 | 91  | ILMN_2483493 | 692169 | IGKV15-103 | immunoglobulin kappa chain variable 15-103                                     |
| scl45509.5.1_248                                 | 92  | ILMN_2653555 | 14939  | Gzmb       | granzyme B                                                                     |
| scl54390.1.1_5                                   | 93  | ILMN_1226793 | 260300 | Gm1549     | gene model 1549, (NCBI)                                                        |
| scl0018143.2_289                                 | 94  | ILMN_2668835 | 18143  | Npas2      | neuronal PAS domain protein 2                                                  |
| scl34335.3_203                                   | 95  | ILMN_2774681 | 26887  | Chst4      | carbohydrate (chondroitin 6/keratan) sulfotransferase 4                        |
| scl54914.7.1_116                                 | 96  | ILMN_2510905 | 170828 | Vgll1      | vestigial like 1 homolog (Drosophila)                                          |
| scl0001193.1_40                                  | 97  | ILMN_2659006 | 269823 | Pon3       | paraoxonase 3                                                                  |
| IGKV4-72_AJ231219_Ig_kappa_variable_4-72_18      | 98  | ILMN_1243197 | 385109 | Gm1499     | gene model 1499, (NCBI), IGKV4-72                                              |
| scl0014857.1_108                                 | 99  | ILMN_2657636 | 14857  | Gsta1      | glutathione S-transferase, alpha 1 (Ya)                                        |
| IGHV9S6_L14366_Ig_heavy_variable_9S6_92          | 100 | ILMN_2478220 | 674147 | LOC674147  | similar to Ig heavy chain V-I region HG3 precursor                             |

|                                                           |     |              |        |                |                                                                  |
|-----------------------------------------------------------|-----|--------------|--------|----------------|------------------------------------------------------------------|
| scl46285.11.1_214                                         | 101 | ILMN_2639136 | 71412  | Dhrs2          | dehydrogenase/reductase member 2 (Dhrs2), mRNA.                  |
| scl000477.1_15                                            | 102 | ILMN_2686087 | 66388  | Cutc           | cutC copper transporter homolog (E.coli)                         |
| scl0067628.2_320                                          | 103 | ILMN_1215011 | 67628  | Anp32b         | acidic (leucine-rich) nuclear phosphoprotein 32 family, member B |
| scl4527.1.1_323                                           | 104 | ILMN_1237204 | 258952 | Olf341         | olfactory receptor 341                                           |
| TRAV12D-1_X06308_T_cell_receptor_alpha_variable_12D-1_143 | 105 | ILMN_2472831 | 630086 | Trav12-1       | T cell receptor alpha variable 12-1                              |
| scl32646.8.1_89                                           | 106 | ILMN_1248952 | 16833  | Ldhc           | lactate dehydrogenase C                                          |
| scl0241516.2_316                                          | 107 | ILMN_2735121 | 241516 | Fsip2          | fibrous sheath-interacting protein 2                             |
| scl53440.6.1_16                                           | 108 | ILMN_2591342 | 225884 | BC021614       | cDNA sequence BC021614                                           |
| scl0068045.1_0                                            | 109 | ILMN_1246483 | 68045  | 2700060E02 Rik | RIKEN cDNA 2700060E02 gene                                       |
| scl27604.2_9                                              | 110 | ILMN_1230278 | 20311  | Cxcl5          | chemokine (C-X-C motif) ligand 5                                 |
| scl21086.3.1_42                                           | 111 | ILMN_2666764 | 78617  | Cstad          | CSA-conditional, T cell activation-dependent protein             |
| scl23881.4_371                                            | 112 | ILMN_2671878 | 73172  | Dem1           | defects in morphology 1 homolog (S. cerevisiae)                  |
| scl000319.1_7                                             | 113 | ILMN_2755195 | 56215  | Acin1          | apoptotic chromatin condensation inducer 1                       |
| scl21127.13.3_15                                          | 114 | ILMN_2689119 | 19730  | Ralgds         | ral guanine nucleotide dissociation stimulator                   |
| scl0108653.1_104                                          | 115 | ILMN_2607434 | 108653 | 4933426K21 Rik | RIKEN cDNA 4933426K21 gene                                       |
| scl0003571.1_24                                           | 116 | ILMN_2621122 | 109161 | Ube2q2         | ubiquitin-conjugating enzyme E2Q (putative) 2                    |
| scl0107993.3_117                                          | 117 | ILMN_2731774 | 107993 | Bfsp2          | beaded filament structural protein 2, phakinin                   |

|                                           |     |              |        |               |                                                                                                |
|-------------------------------------------|-----|--------------|--------|---------------|------------------------------------------------------------------------------------------------|
| scl000110.1_1                             | 118 | ILMN_1249264 | 18631  | Pex11a        | peroxisomal biogenesis factor 11a                                                              |
| IGKV8-18_Y15979_Ig_kappa_variable_8-18_12 | 119 | ILMN_1255400 | 384419 | Gm10883       | predicted gene, Igkv8-30                                                                       |
| scl28280.10.1_35                          | 120 | ILMN_2688894 | 66857  | 1100001H23Rik | RIKEN cDNA 1100001H23 gene                                                                     |
| scl0002706.1_4                            | 121 | ILMN_1256890 | 70122  | Mllt3         | myeloid/lymphoid or mixed-lineage leukemia (trithorax homolog, Drosophila); translocated to, 3 |
| scl0071770.1_48                           | 122 | ILMN_2711007 | 71770  | Ap2b1         | adaptor-related protein complex 2, beta 1 subunit                                              |
| scl056078.2_10                            | 123 | ILMN_2670368 | 56078  | Car5b         | carbonic anhydrase 5b, mitochondrial                                                           |
| scl29002.2.1_9                            | 124 | ILMN_2772762 | 15405  | Hoxa9         | homeo box A9                                                                                   |
| scl23468.6.1_93                           | 125 | ILMN_1220280 | 110326 | Tas1r1        | taste receptor, type 1, member 1                                                               |
| scl41468.13.1_27                          | 126 | ILMN_1253178 | 11670  | Aldh3a1       | aldehyde dehydrogenase family 3, subfamily A1 (Aldh3a1), mRNA.                                 |
| scl39249.20_276                           | 127 | ILMN_2729743 | 72055  | Slc38a10      | solute carrier family 38, member 10                                                            |
| IGHV1S28_X02460_Ig_heavy_variable_1S28_13 | 128 | ILMN_2517595 | 111507 | IGHV1S28      | immunoglobulin heavy chain complex, mRNA                                                       |
| scl078833.3_67                            | 129 | ILMN_2589960 | 78833  | Gins3         | GINS complex subunit 3 (Psf3 homolog)                                                          |
| scl0387349.1_257                          | 130 | ILMN_2607229 | 387349 | Tas2r121      | taste receptor, type 2, member 121                                                             |
| scl30651.1_27                             | 131 | ILMN_1217590 | 20768  | Sephs2        | selenophosphate synthetase 2                                                                   |
| scl4936.1.1_100                           | 132 | ILMN_2775910 | 258580 | Olf1023       | olfactory receptor 1023                                                                        |
| scl0001997.1_57                           | 133 | ILMN_2777405 | 13684  | Eif4e         | eukaryotic translation initiation factor 4E                                                    |
| IGHV3S2_M12435_Ig_heavy_variable_3S2_32   | 134 | ILMN_2432255 | 630337 | LOC630337     | similar to Ig heavy chain V region 1B43 precursor (LOC630337), mRNA.                           |
| IGKV5-                                    | 135 | ILMN_381783  | 381783 | Igkv5-43      | immunoglobulin kappa chain variable 5-43                                                       |



|                                                 |     |                      |               |                   |                                                                                                                                                      |
|-------------------------------------------------|-----|----------------------|---------------|-------------------|------------------------------------------------------------------------------------------------------------------------------------------------------|
| 43_AJ235973_ig_kappa_variable_5-43_8            |     | 12514<br>51          |               |                   |                                                                                                                                                      |
| scl51170.17.1_3-5                               | 136 | ILMN_<br>12586<br>74 | 321007        | Serac1            | serine active site containing 1                                                                                                                      |
| scl53375.12.1_13                                | 137 | ILMN_<br>27718<br>51 | 54525         | Syt7              | synaptotagmin VII                                                                                                                                    |
| scl34866.14.1_23                                | 138 | ILMN_<br>26929<br>80 | 212326        | Fam149a           | family with sequence similarity 149, member A                                                                                                        |
| scl022337.1_17                                  | 139 | ILMN_<br>24986<br>95 | 22337         | Vdr               | vitamin D receptor                                                                                                                                   |
| IGKV17-121_AJ231258_ig_kappa_variable_17-121_16 | 140 | ILMN_<br>26123<br>46 | 383196        | LOC383196         | hypothetical LOC383196 (LOC383196), mRNA.                                                                                                            |
| scl22353.18_6                                   | 141 | ILMN_<br>12294<br>18 | 12807         | Hps3              | Hermansky-Pudlak syndrome 3 homolog (human)                                                                                                          |
| scl0020868.1_54                                 | 142 | ILMN_<br>27033<br>41 | 20868         | Stk10             | serine/threonine kinase 10                                                                                                                           |
| scl0001103.1_81                                 | 143 | ILMN_<br>26297<br>37 | 387314        | Tmtc1             | transmembrane and tetratricopeptide repeat containing 1                                                                                              |
| scl0067374.1_279                                | 144 | ILMN_<br>12275<br>59 | 67374         | Jam2              | junction adhesion molecule 2                                                                                                                         |
| scl45278.7.1_11                                 | 145 | ILMN_<br>27559<br>98 | 66148         | Dnajc15           | DnaJ (Hsp40) homolog, subfamily C, member 15                                                                                                         |
| scl0002546.1_0                                  | 146 | ILMN_<br>27016<br>17 | 14573         | Gdnf              | glial cell line derived neurotrophic factor                                                                                                          |
| scl16240.4.1_0                                  | 147 | ILMN_<br>27552<br>81 | 329253        | BC115961          | hypothetical protein 6530439I21                                                                                                                      |
| IGKC_V00807_ig_kappa_constant_192               | 148 | ILMN_<br>27045<br>62 | 100047<br>628 | LOC1000476<br>28  | similar to Chain L, Structural Basis Of Antigen Mimicry In A Clinically Relevant Melanoma Antigen System, transcript variant 3 (LOC100047628), mRNA. |
| scl4934.1.1_214                                 | 149 | ILMN_<br>26411<br>78 | 258577        | Olfr1026          | olfactory receptor 1026                                                                                                                              |
| scl37650.12_395                                 | 150 | ILMN_<br>26691<br>72 | 75317         | 4930547N16<br>Rik | RIKEN cDNA 4930547N16 gene                                                                                                                           |
| scl0022218.1_0                                  | 151 | ILMN_<br>26329<br>42 | 22218         | Sumo1             | SMT3 suppressor of mif two 3 homolog 1 (yeast)                                                                                                       |

|                                             |     |              |        |                   |                                                                  |
|---------------------------------------------|-----|--------------|--------|-------------------|------------------------------------------------------------------|
| scl0014269.2_161                            | 152 | ILMN_2723708 | 14269  | Fnbp1             | formin binding protein 1                                         |
| scl53490.4_84                               | 153 | ILMN_1247676 | 73703  | Cst6              | cystatin E/M                                                     |
| scl068135.3_22                              | 154 | ILMN_2704585 | 68135  | Eif3h             | eukaryotic translation initiation factor 3, subunit H            |
| scl39522.14_3                               | 155 | ILMN_2595163 | 50997  | Mpp2              | membrane protein, palmitoylated 2 (MAGUK p55 subfamily member 2) |
| scl38846.4.1_6                              | 156 | ILMN_1229993 | 30045  | Dnajc12           | DnaJ (Hsp40) homolog, subfamily C, member 12                     |
| scl016579.20_85                             | 157 | ILMN_2654532 | 16579  | Kifap3            | kinesin-associated protein 3                                     |
| scl20359.10_330                             | 158 | ILMN_1243525 | 18457  | Pldn              | pallidin                                                         |
| scl35378.12_17                              | 159 | ILMN_2775360 | 102626 | Mapkapk3          | mitogen-activated protein kinase-activated protein kinase 3      |
| scl51704.9.1_177                            | 160 | ILMN_1239483 | 246102 | Rtnn              | rotatin                                                          |
| scl015357.2_29                              | 161 | ILMN_1225718 | 15357  | Hmgcr             | 3-hydroxy-3-methylglutaryl-Coenzyme A reductase                  |
| scl30652.3_263                              | 162 | ILMN_1228334 | 66422  | 2410015N17<br>Rik | RIKEN cDNA 2410015N17 gene                                       |
| IGKV4-71_AJ231218_ig_kappa_variable_4-71_20 | 163 | ILMN_2513393 | 434586 | Igkv4-71          | immunoglobulin kappa chain variable 4-71                         |
| scl46658.31_139                             | 164 | ILMN_2670172 | 16402  | Itga5             | integrin alpha 5 (fibronectin receptor alpha)                    |
| scl38446.16_40                              | 165 | ILMN_1253131 | 53605  | Nap1l1            | nucleosome assembly protein 1-like 1                             |
| scl31073.10_61                              | 166 | ILMN_1243030 | 65098  | Zfand6            | zinc finger, AN1-type domain 6                                   |
| scl079560.1_5                               | 167 | ILMN_2675587 | 79560  | Ublcp1            | ubiquitin-like domain containing CTD phosphatase 1               |
| scl0019820.1_259                            | 168 | ILMN_2684450 | 19820  | Rnf12             | ring finger protein 12                                           |
| scl0230597.3_20                             | 169 | ILMN_230597  | 230597 | Zfyve9            | zinc finger, FYVE domain containing 9                            |

|                      |     |                      |               |                        |                                                                                                                                                               |
|----------------------|-----|----------------------|---------------|------------------------|---------------------------------------------------------------------------------------------------------------------------------------------------------------|
|                      |     | 25025<br>25          |               |                        |                                                                                                                                                               |
| scl30914.6_156       | 170 | ILMN_<br>12558<br>28 | 244180        | E030002O03<br>Rik      | RIKEN cDNA E030002O03 gene                                                                                                                                    |
| scl40581.3.1_34      | 171 | ILMN_<br>12432<br>57 | 327860        | OTTMUSG0<br>0000005065 | predicted gene, OTTMUSG00000005065                                                                                                                            |
| scl36437.4.1700_28-S | 172 | ILMN_<br>27326<br>34 | 29873         | Cspg5                  | chondroitin sulfate proteoglycan 5                                                                                                                            |
| scl37121.13.1_3      | 173 | ILMN_<br>26434<br>95 | 235180        | Fez1                   | fasciculation and elongation protein zeta 1<br>(zygin I)                                                                                                      |
| scl0016071.1_62      | 174 | ILMN_<br>26843<br>71 | 100047<br>628 | LOC1000476<br>28       | similar to Chain L, Structural Basis Of Antigen<br>Mimicry In A Clinically Relevant Melanoma<br>Antigen System, transcript variant 3<br>(LOC100047628), mRNA. |
| scl013627.1_210      | 175 | ILMN_<br>27287<br>56 | 13627         | Eef1a1                 | eukaryotic translation elongation factor 1<br>alpha 1                                                                                                         |
| scl41457.2_174       | 176 | ILMN_<br>12444<br>24 | 11541         | Adora2b                | adenosine A2b receptor                                                                                                                                        |
| scl0252903.3_21      | 177 | ILMN_<br>12238<br>84 | 252903        | Ap1s3                  | adaptor-related protein complex AP-1, sigma<br>3                                                                                                              |
| scl0014580.2_305     | 178 | ILMN_<br>12147<br>15 | 14580         | Gfap                   | glial fibrillary acidic protein                                                                                                                               |
| scl22202.5_66        | 179 | ILMN_<br>27291<br>13 | 73173         | Pcdh18                 | protocadherin 18                                                                                                                                              |
| scl19559.5.1_2       | 180 | ILMN_<br>26604<br>61 | 77701         | Lcn12                  | lipocalin 12                                                                                                                                                  |
| scl00103694.2_35     | 181 | ILMN_<br>26986<br>06 | 103694        | Tmed4                  | transmembrane emp24 protein transport<br>domain containing 4                                                                                                  |
| scl0066970.1_29      | 182 | ILMN_<br>12527<br>46 | 66970         | Ssbp2                  | single-stranded DNA binding protein 2                                                                                                                         |
| scl31573.3_3         | 183 | ILMN_<br>27777<br>06 | 24030         | Mrps12                 | mitochondrial ribosomal protein S12                                                                                                                           |
| scl55051.5.1_194     | 184 | ILMN_<br>12212<br>25 | 236285        | Lancl3                 | LanC lantibiotic synthetase component C-like<br>3 (bacterial)                                                                                                 |
| scl25783.3.1_76      | 185 | ILMN_<br>24973<br>49 | 67235         | Zkscan14               | zinc finger with KRAB and SCAN domains 14                                                                                                                     |
| scl0100715.1_21      | 186 | ILMN_                | 100715        | Papd4                  | PAP associated domain containing 4                                                                                                                            |

|                  |     |                      |        |                   |                                                                |
|------------------|-----|----------------------|--------|-------------------|----------------------------------------------------------------|
|                  |     | 26291<br>46          |        |                   |                                                                |
| scl49664.19_17   | 187 | ILMN_<br>25902<br>19 | 268970 | Arhgap28          | Rho GTPase activating protein 28                               |
| scl0319772.2_40  | 188 | ILMN_<br>26765<br>24 | 319772 | C13005001<br>8Rik | RIKEN cDNA C130050018 gene                                     |
| scl49758.2.1_108 | 189 | ILMN_<br>26554<br>98 | 18188  | Nrtn              | neurturin                                                      |
| scl0001329.1_110 | 190 | ILMN_<br>12324<br>20 | 55978  | Ift20             | intraflagellar transport 20 homolog<br>(Chlamydomonas)         |
| scl0002027.1_43  | 191 | ILMN_<br>25951<br>15 | 56376  | Pdlim5            | PDZ and LIM domain 5                                           |
| GI_84370245-I    | 192 | ILMN_<br>31627<br>85 | 72780  | Rspo3             | R-spondin 3 homolog (Xenopus laevis)                           |
| scl23771.9.1_58  | 193 | ILMN_<br>25948<br>81 | 54709  | Eif3i             | eukaryotic translation initiation factor 3,<br>subunit I       |
| scl8638.1.1_202  | 194 | ILMN_<br>12249<br>06 | 171228 | V1re5             | vomeronal 1 receptor, E5                                       |
| scl30036.21_295  | 195 | ILMN_<br>25914<br>14 | 52440  | Tax1bp1           | Tax1 (human T-cell leukemia virus type I)<br>binding protein 1 |
| scl39817.6_54    | 196 | ILMN_<br>12443<br>58 | 20305  | Ccl6              | chemokine (C-C motif) ligand 6                                 |
| scl4190.1.1_196  | 197 | ILMN_<br>27249<br>23 | 258441 | Olfr1310          | olfactory receptor 1310                                        |
| scl0003609.1_104 | 198 | ILMN_<br>12197<br>47 | 26968  | Islr              | immunoglobulin superfamily containing<br>leucine-rich repeat   |
| scl0394435.7_126 | 199 | ILMN_<br>12225<br>43 | 394430 | Ugt1a10           | UDP glycosyltransferase 1 family, polypeptide<br>A10 (cluster) |
| scl0011799.1_42  | 200 | ILMN_<br>26036<br>99 | 11799  | Birc5             | baculoviral IAP repeat-containing 5                            |

Rank—Similarity to exemplar in Kmeans cluster profile

Gray—Immunoglobulin family genes
