# Supplementary material for: Critical Transition in Tissue Homeostasis Accompanies Murine Lung Senescence
Source: PubMed Central journal article supplement (PMC3119663; doi:10.1371/journal.pone.0020712), 2011-06-21
Supplement: pone.0020712.s007.pdf [file pone.0020712.s007.pdf]

**Supplemental Table 2: Fold change by Real-Time PCR of Selected Peak Genes<sup>1</sup>**

| <b>Genes</b> | <b>4 vs 8-FC<sup>2</sup></b> | <b>p Value</b> | <b>4 vs 12-FC<sup>2</sup></b> | <b>p Value</b> | <b>8 vs 12-FC<sup>2</sup></b> | <b>P Value</b> |
|--------------|------------------------------|----------------|-------------------------------|----------------|-------------------------------|----------------|
| <i>ATG3</i>  | 1.21                         | 0.03*          | 1.03                          | 0.14           | 1.48                          | 0.002**        |
| <i>GSTA2</i> | 0.91                         | 0.37           | 0.91                          | 0.22           | 3.85                          | 0.002**        |
| <i>CDH13</i> | 1.20                         | 0.24           | 0.98                          | 0.46           | 0.68                          | 0.002**        |
| <i>LEAP2</i> | 1.50                         | 0.006**        | 1.83                          | 0.005**        | 0.56                          | 0.07†          |
| <i>PRKG2</i> | 1.22                         | 0.19           | 1.25                          | 0.18           | 0.88                          | 0.065†         |
| <i>DACH1</i> | 1.42                         | 0.003**        | 1.98                          | 0.07†          | 0.71                          | 0.002**        |
| <i>GZMB</i>  | 2.25                         | 0.07†          | 3.0                           | 0.007*         | 0.75                          | 0.065†         |
| <i>TFF1</i>  | 1.33                         | .93            | 0.903                         | 0.343          | 2.67                          | 0.05*          |

\*p<.05, \*\*p<.01, †p<.10

<sup>1</sup>3-4 mice per time point

<sup>2</sup>FC-Fold Change
